# Supplementary material
Source: HighWire-hosted journal article supplement (https://bmjopensem.bmj.com/highwire/filestream/141046/field_highwire_adjunct_files/0/Press_release.pdf)
Supplement: Press_release.pdf [file Press_release.pdf]

## BMJ OPEN SPORT & EXERCISE MEDICINE

Externally peer reviewed? Yes

Evidence type: Observational

Subjects: People

### **E-bikes not likely to help users reach moderate-vigorous physical activity targets**

*Riders tend to take fewer and less physically demanding trips than conventional cyclists*

*But e-bikes may persuade older people to take to two wheels who wouldn't otherwise cycle*

E-bikes aren't likely to help users reach weekly moderate to vigorous physical activity targets, because riders tend to take fewer and less physically demanding trips than conventional cyclists, suggests research published in the open access journal ***BMJ Open Sport & Exercise Medicine***.

But e-bikes may persuade older and/or overweight people to take to two wheels who wouldn't otherwise consider using a bike, suggest the researchers.

E-bikes have become increasingly popular in recent years, with around 3.4 million sold in European Union countries in 2019, compared with only 98,000 in 2006.

This number is expected to increase further to 62 million by 2030. And a similarly rapid rise in popularity is anticipated in Asia and the USA.

It's not entirely clear whether e-bikes help users meet physical activity guidelines and whether they might also boost the rate of cycling accidents.

The researchers therefore compared recommended weekly targets of 150 minutes moderate-intense, or 75 minutes of vigorous-intense, physical activity (MVPA) and accident rates in 1250 e-bikers and 629 conventional cyclists from across Germany.

The volunteers provided information on health related quality of life, daily physical activity, and health issues, as well as details of any cycling accidents.

They were asked to record the riding time, distance travelled, and heart rate for every cycle ride over a period of 4 weeks, using a smartwatch activity tracker. Accident rates were monitored over a period of 12 months.

The e-bikers tended to be older, weigh more, have more underlying health conditions, and to do less exercise but more leisure time physical activity than the conventional cyclists.

E-bikers did an average of almost 70 fewer minutes of MVPA than conventional cyclists, who clocked up 150+ minutes more MVPA on their bikes.

Conventional cyclists also took more weekly trips, on average, than the e-bikers: around 6 vs around 4.

The overall time spent on a bike was also nearly 25 minutes longer, on average, among the conventional cyclists, although e-bikers took longer trips, clocking up an average of 6.5 extra minutes.

Cyclists' average heart rates were also higher, suggesting a greater level of exertion: 119 beats per minute vs 111 beats per minute among the e-bikers.

Age, sex, underlying conditions, and reported use of a bike for sport and commuting were significant predictive factors for reaching weekly recommended physical activity targets. E-bikers were around half as likely as conventional cyclists to reach these targets.

Overall, 109 accidents and 157 near accidents occurred during the 12-month monitoring period. After accounting for potentially influential factors, use of an e-bike and overall time spent on a bike, predicted road traffic accident risk, with e-bikers 63% more likely to have a traffic accident than conventional cyclists.

The most commonly cited reason for buying either type of bike was physical fitness, but e-bikers were twice as likely to cite convenience (ease of cycling) as the conventional cyclists. Protecting the environment or saving money were scarcely mentioned.

“The participant characteristics of our cohort suggest that e-biking is of interest, particularly for those who will benefit the most for health-related fitness—namely, older users, overweight and obese individuals, or those with health related limitations and fewer exercise activities,” write the researchers.

This is an observational study, and the researchers acknowledge that heart rate assessment wasn't as accurate as an ECG trace would have been.

But their findings back up those of previous studies showing that “e-biking provides the option to continue cycling despite physical limitations, and has the potential to maintain physical activity and fitness,” they add.

“Further research on users' motives and possible replacement of other transport modes is necessary to shed light on whether e-bikes, as an active form of electromobility, could feasibly provide a relevant contribution to mitigating traffic congestion and air pollution, and promote active living,” they conclude.
